# Supplementary material
Source: PubMed Central journal article supplement (PMC4771316)
Supplement: AEM.03299-15_zam999116968so1.pdf [file AEM.03299-15_zam999116968so1.pdf]

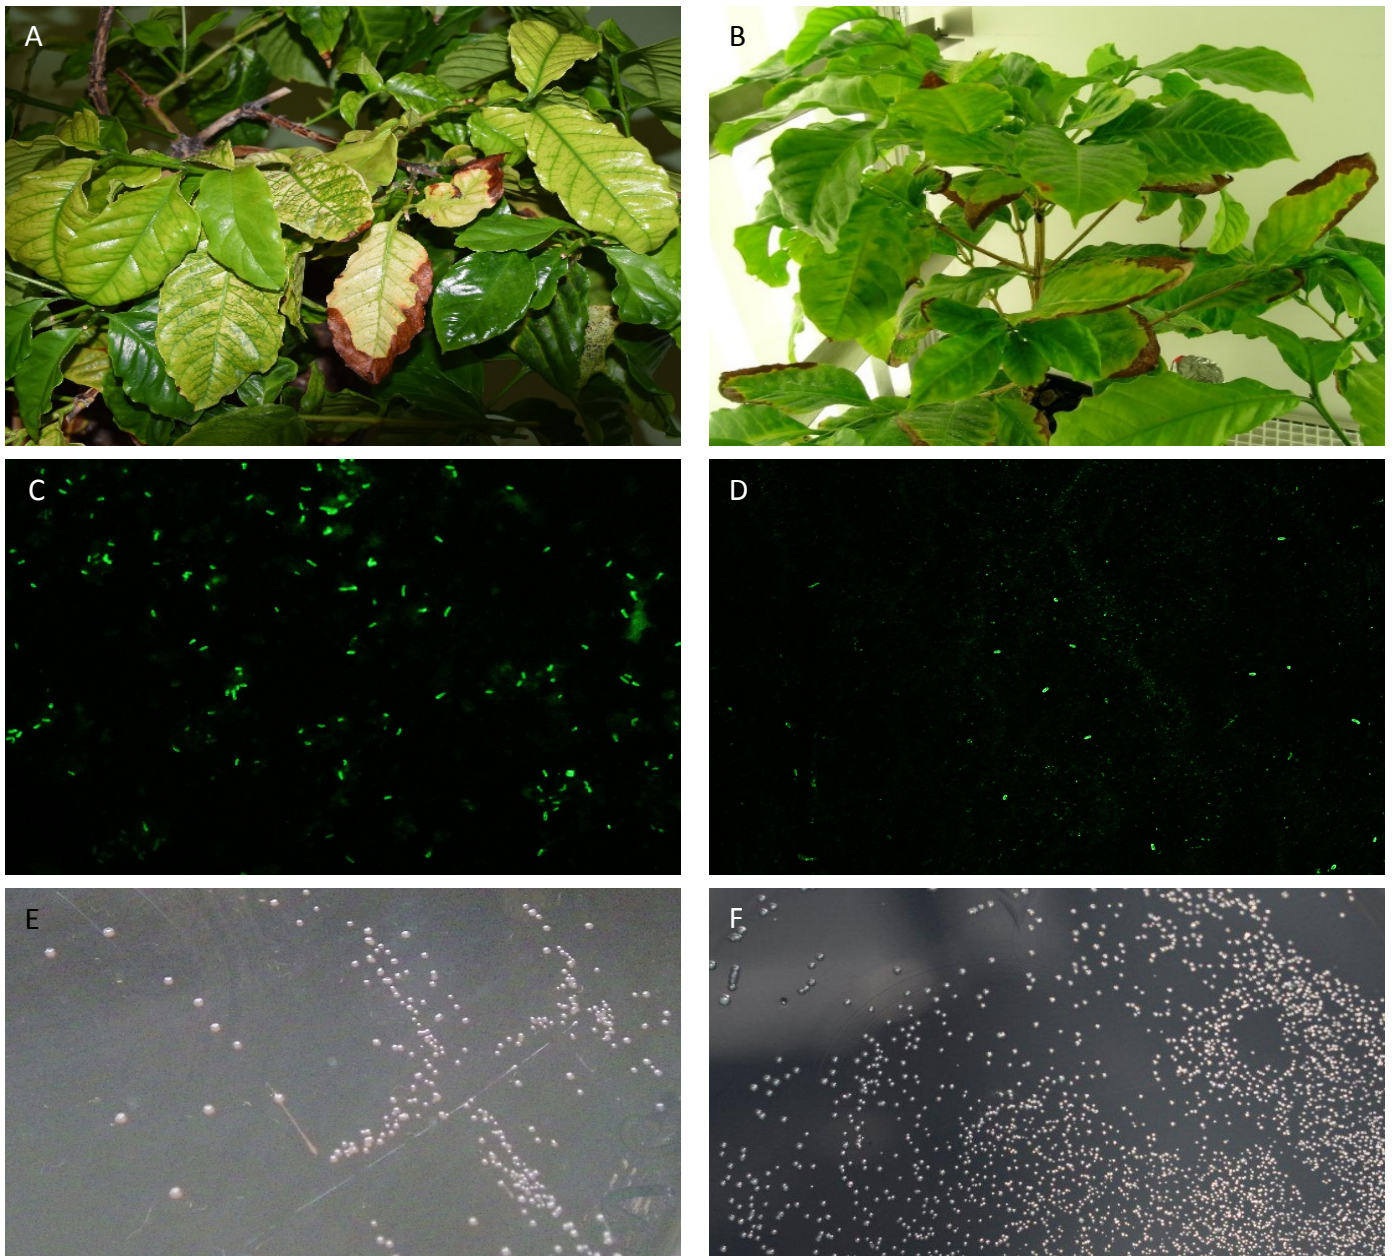

**Figure S1.** Illustration of symptoms observed in coffee plants, bacterial cells and colonies isolated from these symptoms. Coffee leaf scorch on (A) a *Coffea arabica* plant originating from Ecuador, from which Strain CFBP 8072 was isolated and (B) on a *C. canephora* plants originating from Mexico, from which Strain CFBP 8073 was isolated. Cells of CFBP 8072 (C) and CFBP 8073 (D) visualized by immunofluorescence using a *Xylella fastidiosa*-specific antibody. Colony of CFBP 8072 (E) and CFBP 8073 (F) growing on PWG and B-CYE media, respectively.

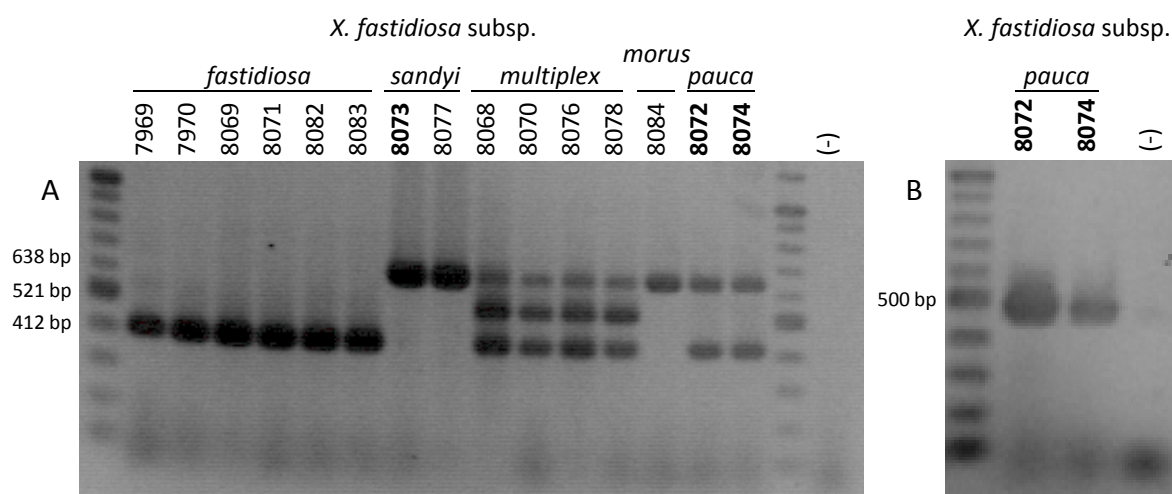

**Figure S2.** Gel photographs showing the signals obtained for the three *Xylella* strains (CFBP 8072, CFBP 8073, and CFBP 8074) isolated from coffee cuttings in comparison to strains representing the subspecies *fastidiosa*, *sandyi*, *multiplex*, and *morus* of *X. fastidiosa* with the identification tests described by Hernandez-Martinez et al. (1) (a) and Pooler and Hartung (2)(b). The CFBP code of each strain is indicated above each lane. (-) indicates negative control, i.e. tests with water.

**1. Hernandez-Martinez, R, Costa HS, Dumenyo CK, Cooksey DA.** 2006. Differentiation of strains of *Xylella fastidiosa* infecting grape, almonds and oleander using a multiprimer PCR assay. *Plant Dis.* **90**:1382-1388.

**2. Pooler MR, Hartung JS.** 1995. Specific PCR detection and identification of *Xylella fastidiosa* strains causing citrus variegated chlorosis. *Curr Microbiol* **31**:377-381.

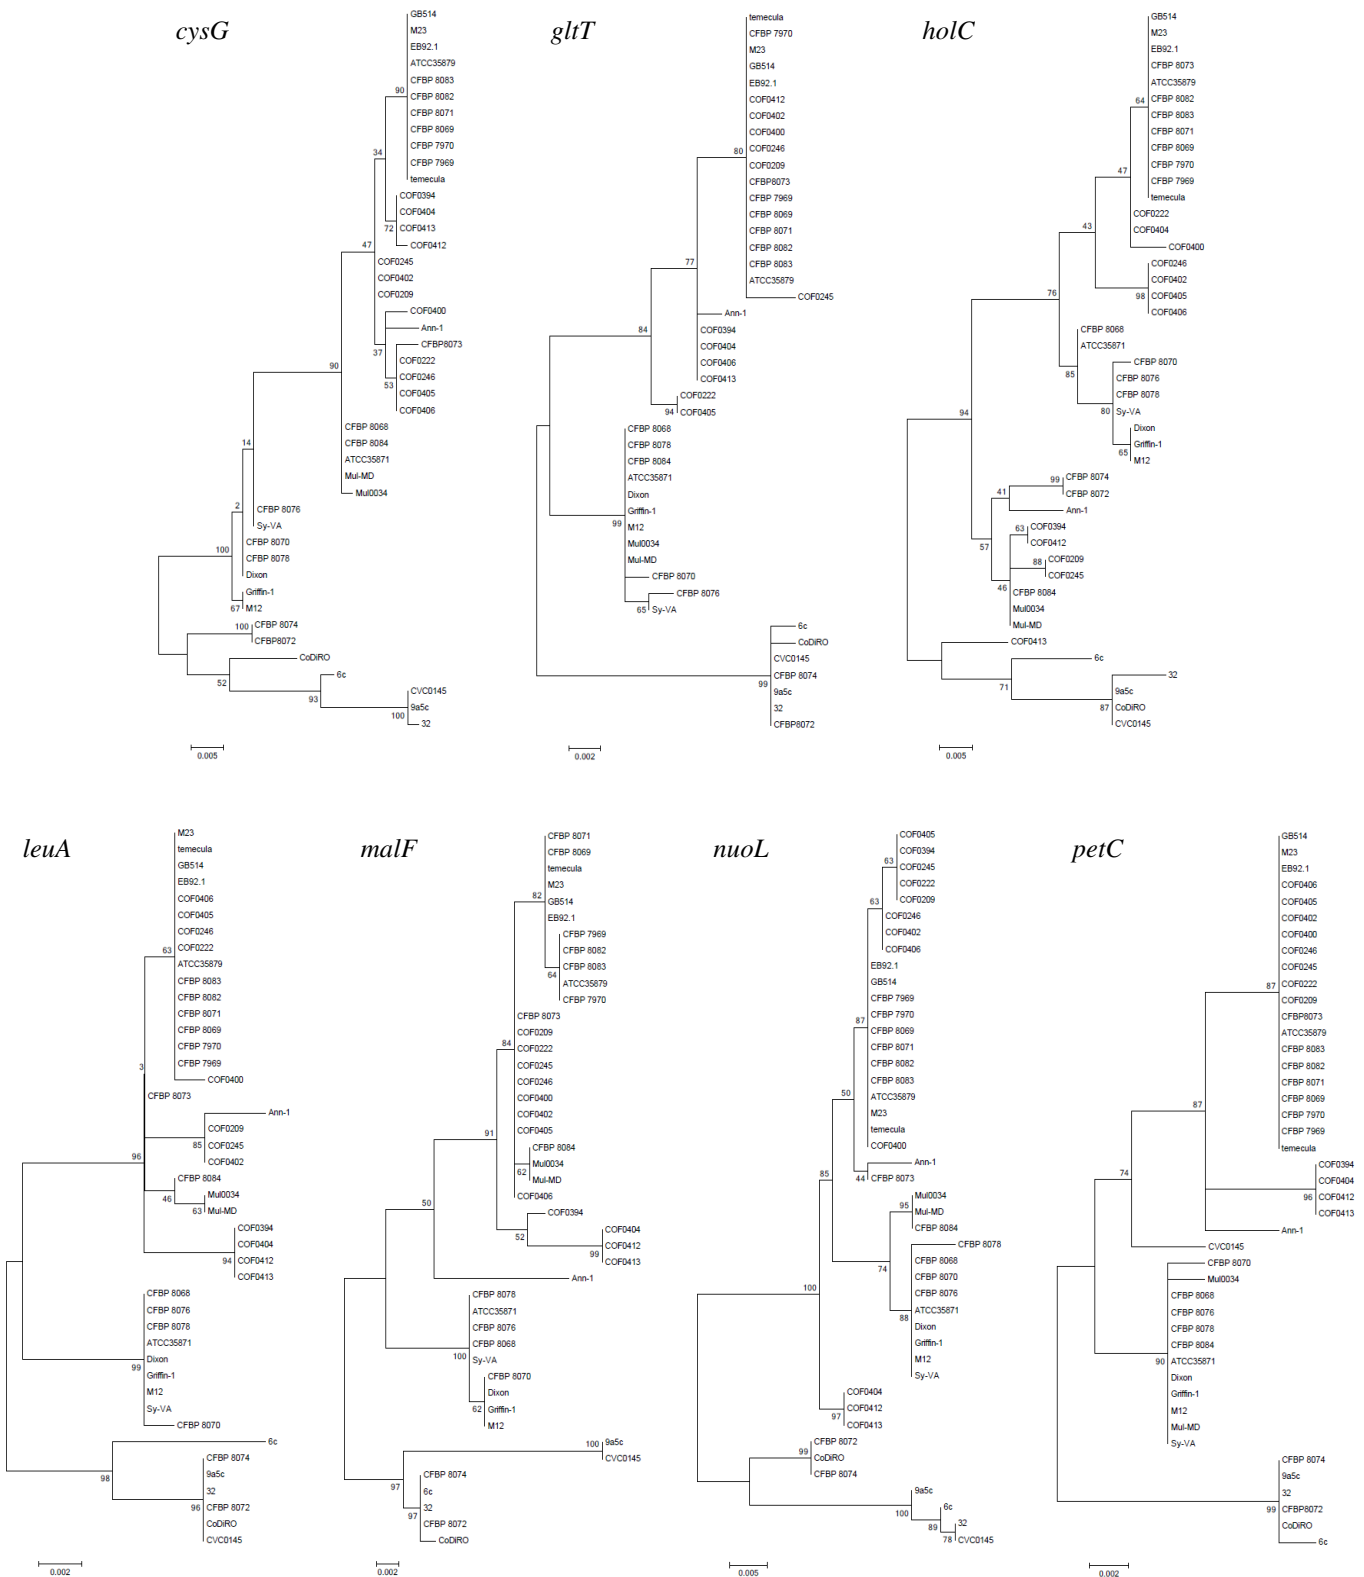

**Figure S3.** Maximum likelihood trees based on the partial sequences of *cysG*, *gltT*, *holC*, *leuA*, *malF*, *nuoL*, *petC*. Bootstrap scores (1,000 replicates) are displayed at each node.

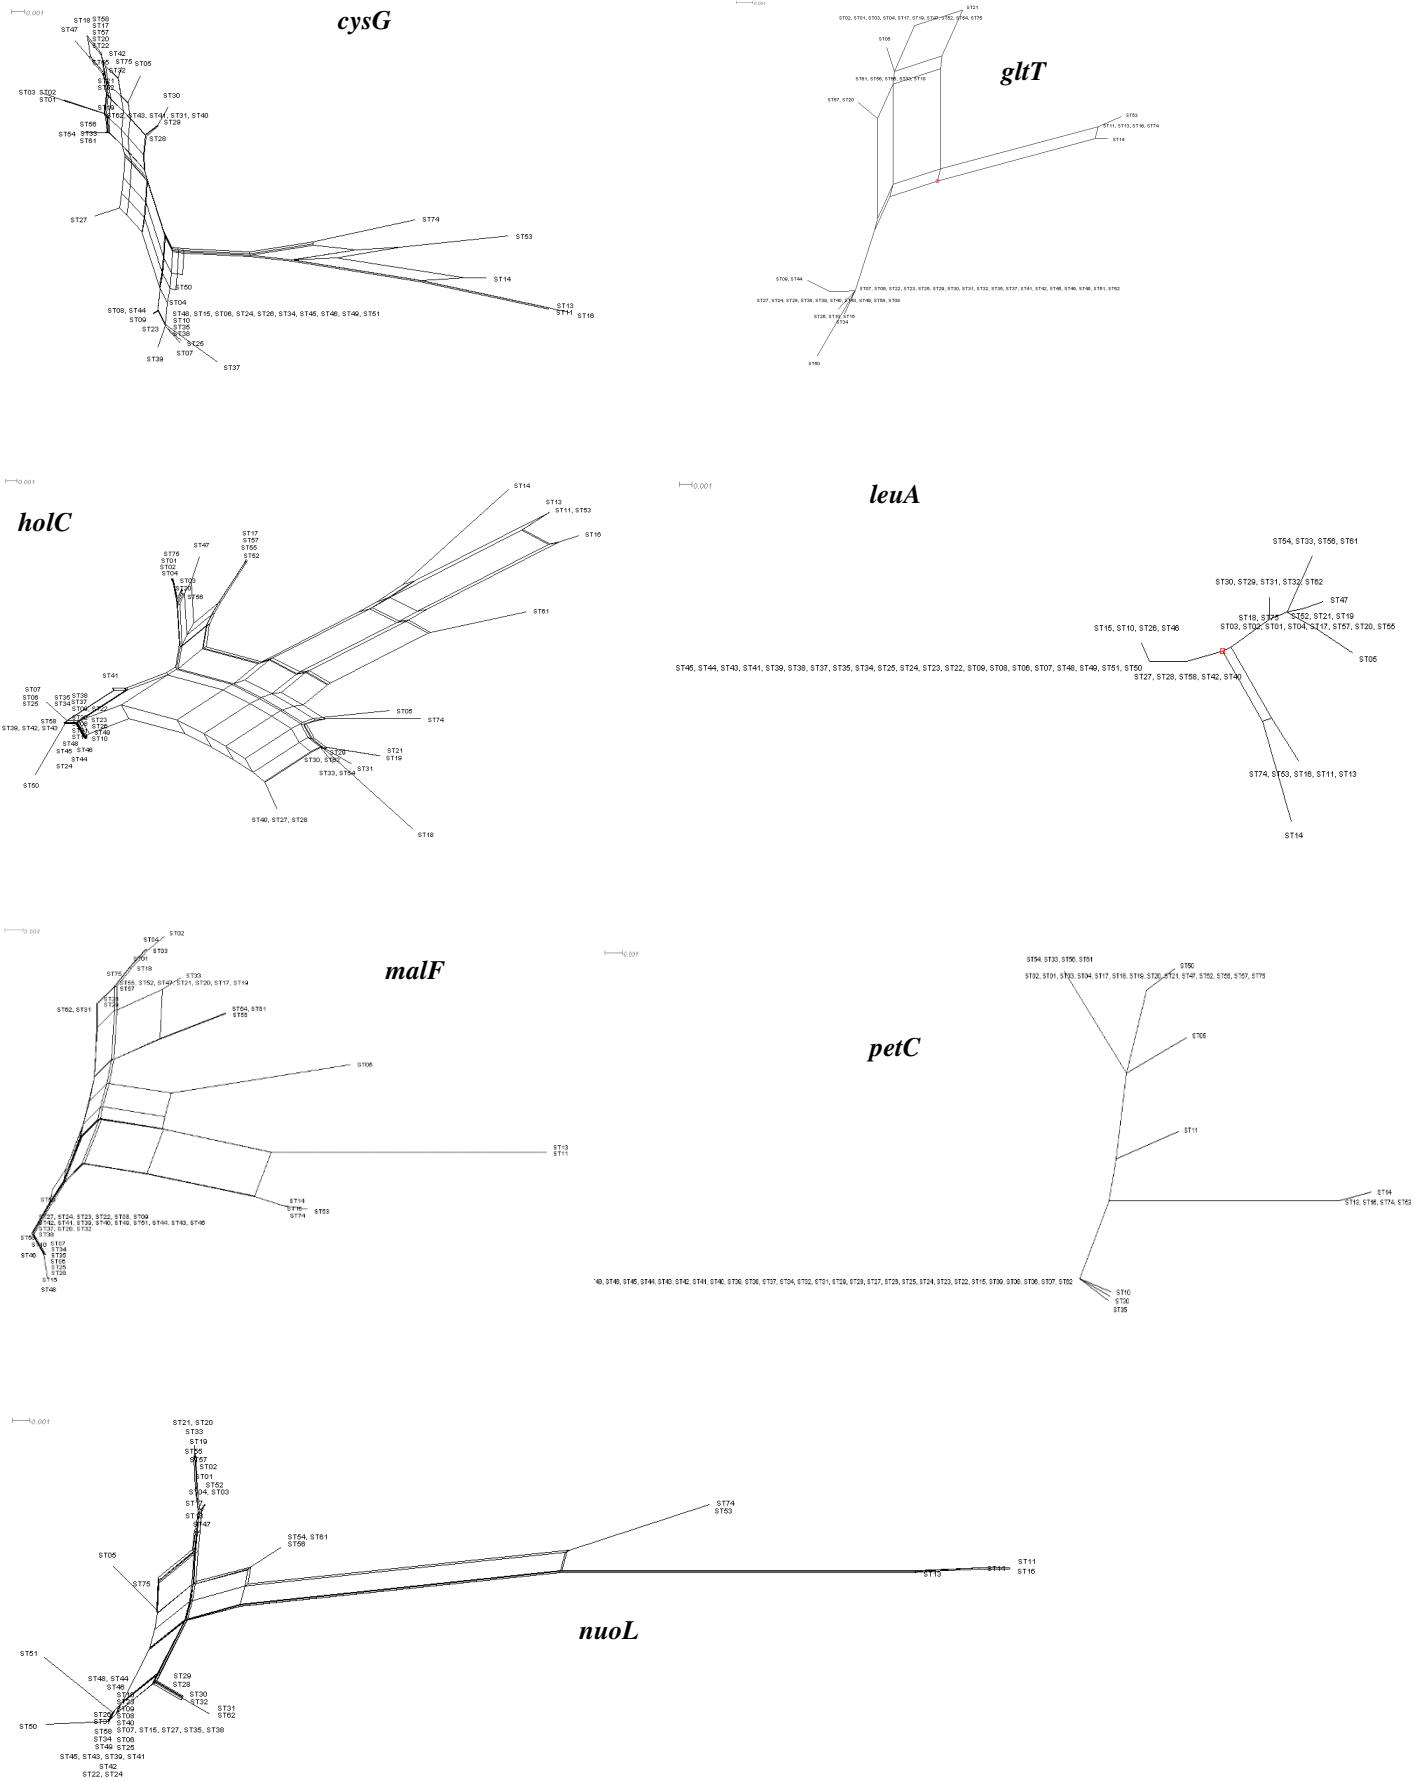

**Figure S4.** Split graphs of multilocus sequence analysis of the *X. fastidiosa* strains of each sequence type (ST) for the 7 loci (*cysG*, *gltT*, *holC*, *leuA*, *malF*, *nuoL* and *petC*). The designation at each of the leaves indicates the ST number. See Tables 1 and 4 for strain designations and ST correspondences, respectively.

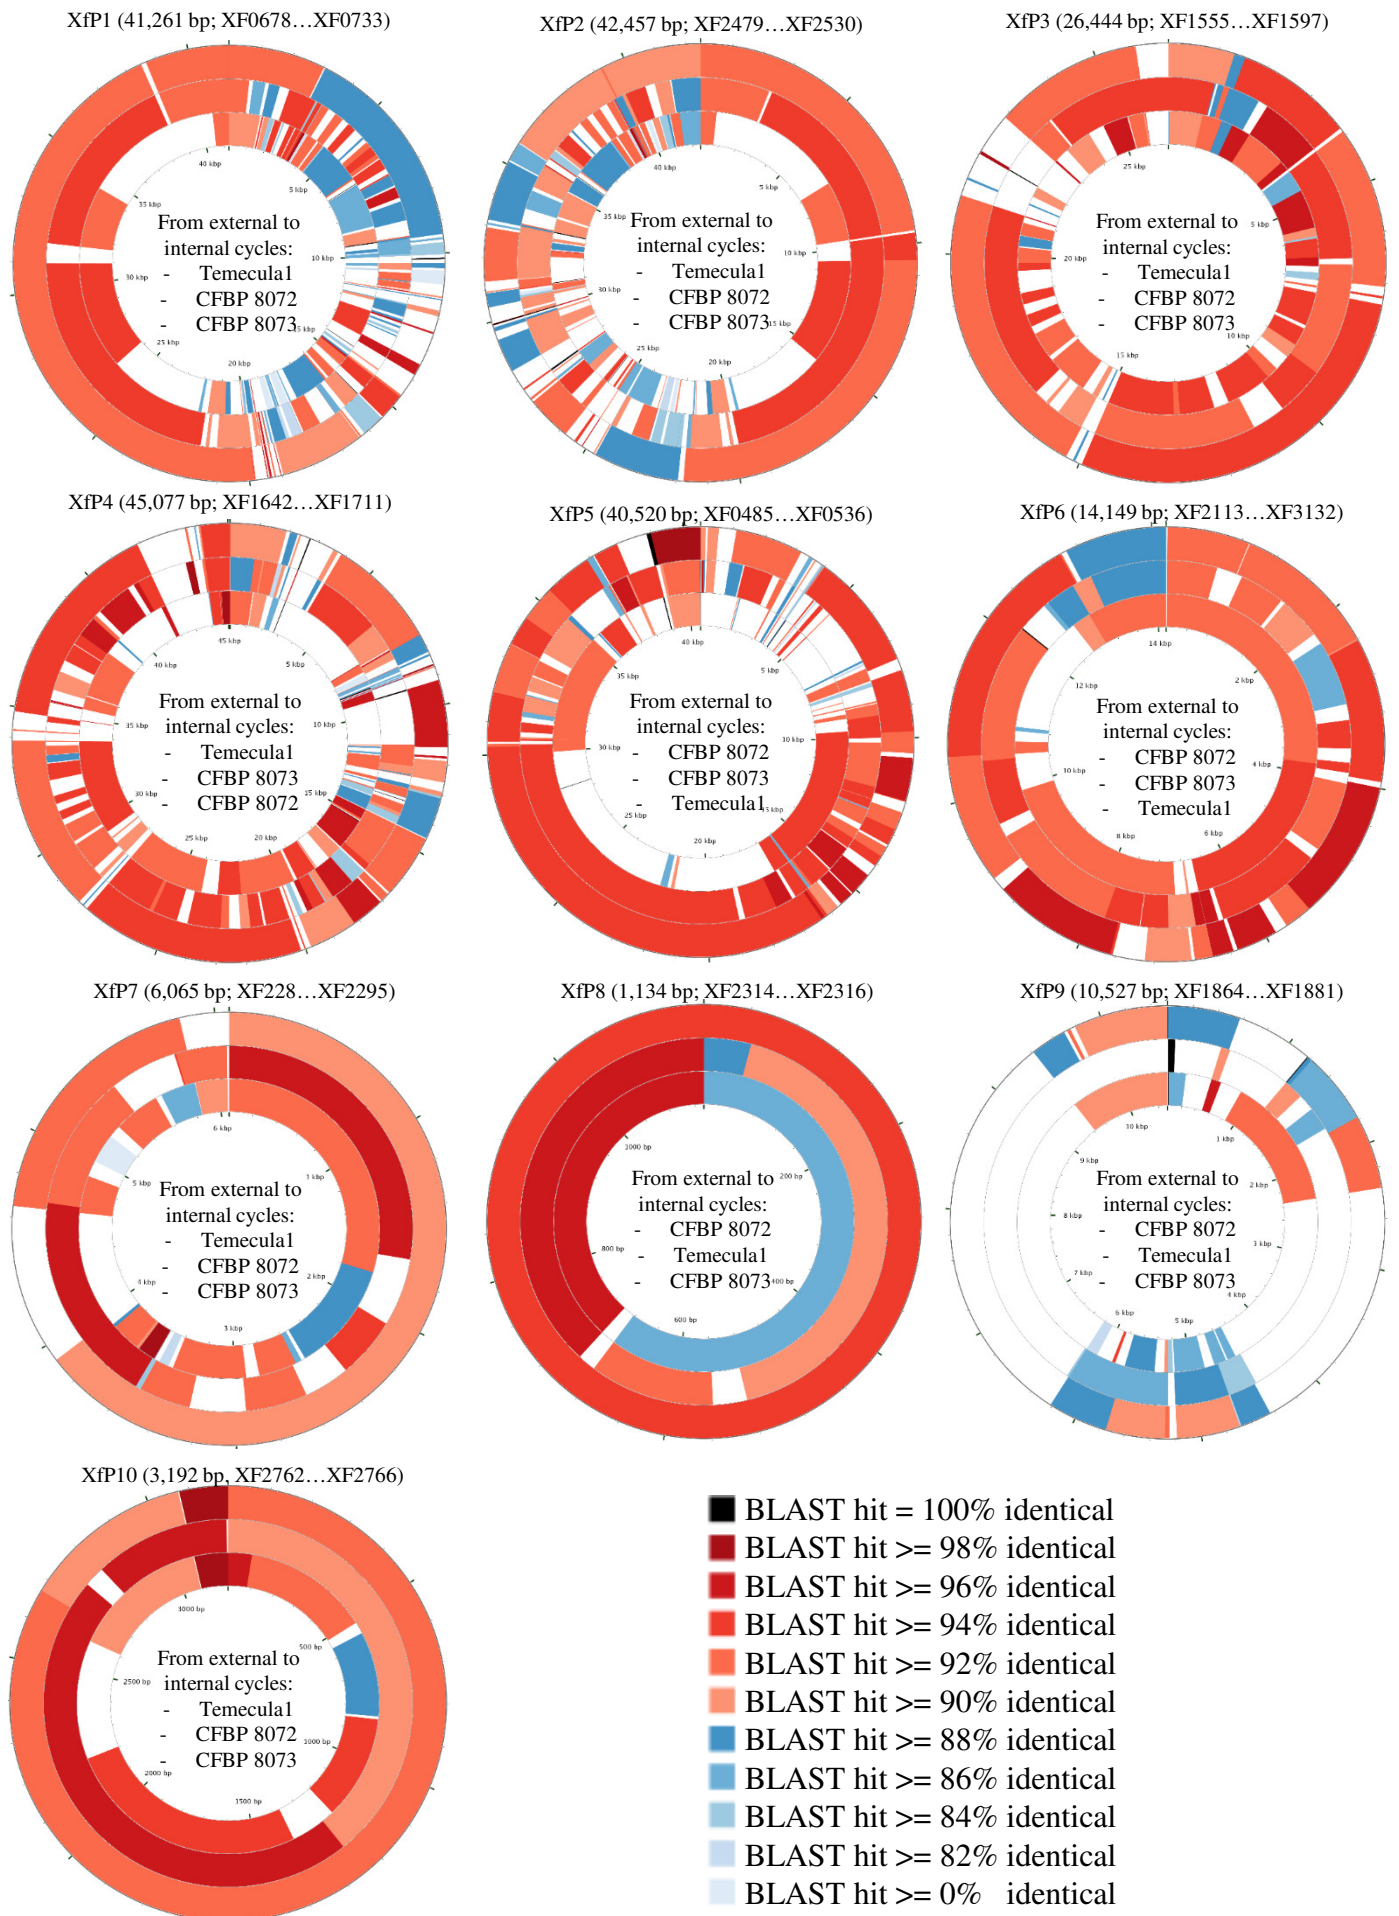

**Figure S5.** Conservation of Xfp1-10 phages from *X. fastidiosa* Strain 9a5c in genome sequences of CFBP 8072, CFBP 8073 and Temecula-1.

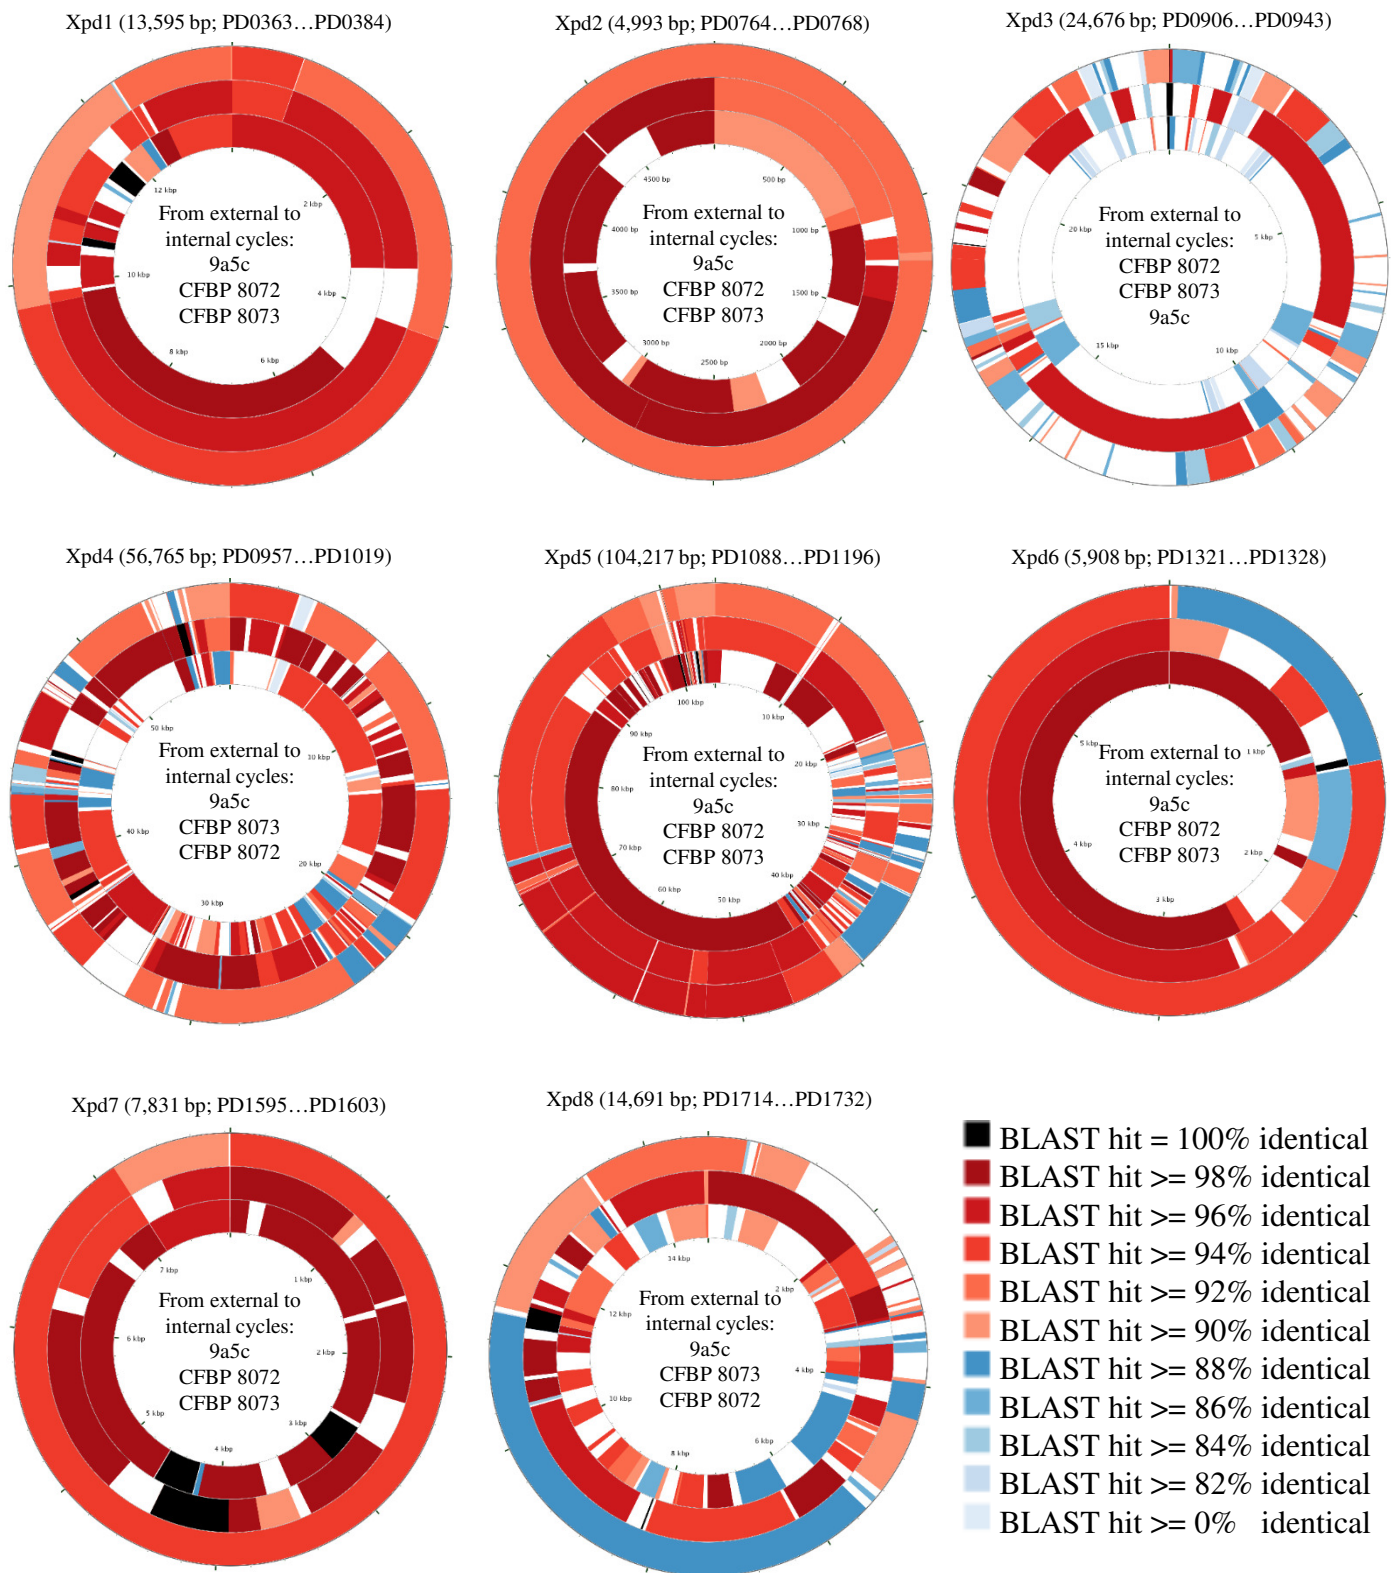

**Figure S6.** Conservation of Xfp1-8 phages from *X. fastidiosa* Strain Temecila-1 in genome sequences of CFBP 8072, CFBP 8073 and 9a5c.

## Methionyl-t-RNA-synthetase (*metG*)

ATCC35871 (F820\_RS0104705) **AACCGCATCCCATGTCAAACACAGCACCACCA**  
 N A S M S N T A P P

Griffin-1 (M233\_00365) **AACCGCATCCCATGTCAAACACAGCACCACCA**  
 N A S M S N T A P P

M12 (XfasM12\_1753) **AACCGCATCCCATGTCAAACACAGCACCACCA**  
 N A S M S N T A P P

Mul0034 (P303\_07735) **AACCGCATCCCATGTCAAACACAGCACCACCA**  
 N A S M S N T A P P

Mul-MD (P910\_001364) **AACCGCATCCCATGTCAAACACAGCACCACCA**  
 N A S M S N T A P P

Sy-VA (DF22\_001966) **AACCGCATCCCATGTCAAACACAGCACCACCA**  
 N A S M S N T A P P

Dixon (XFASADRAFT\_RS00950) **AACCGCATCCCATGTCAAACACAGCACCACCA**  
 N A S M S N T A P P

Ann-1 (D934\_RS11260) **AACCGCATCCCATGTCAAACACAGCACCACCA**  
 N A S M S N T A P P

EB92.1 (XFEB\_00975) **AACCGCATCCCATGTCAAACACAGCACCACCA**  
 N A S M S N T A P P

GB514 (XFLM\_02185) **AACCGCATCCCATGTCAAACACAGCACCACCA**  
 N A S M S N T A P P

M23 (XfasM23\_1678) **AACCGCATCCCATGTCAAACACAGCACCACCA**  
 N A S M S N T A P P

Temecula1 (PD1590) **AACCGCATCCCATGTCAAACACAGCACCACCA**  
 N A S M S N T A P P

9a5c (XF0549) **AACCGCATCCCATGTCAAACACAGCACCACCA**  
 N A S M S N T A P P

CoDiRO (RA12\_02050) **AACCGCATCCCATGTCAAACACAGCACCACCA**  
 N A S M S N T A P P

CFBP 8072 (XYFPCFBP8072\_i00120) **AACCGC** **TCCCATGTCAAACACAGCACCACCA** (2x)  
 N A S M S N T A P P

CFBP 8073 (XYFPCFBP8073\_aa00390) **AACCGC** **TCCCATGTCAAACACAGCACCACCA** (1x)  
 N A S M S N T A P P

6c (B375\_RS16320) **AACCGC** **TCCCATGTCAAACACAGCACCACCA** (5x)  
 N A S M S N T A P P

32 (B398\_RS16135) **AACCGC** **TCCCATGTCAAACACAGCACCACCA** (1x)  
 N A S M S N T A P P

## Hypothetical protein

Mul0034 (P303\_05870) **AGGAACAGCATGGAGATGTTTCAGAAA**  
 E Q M E M F R

Mul-MD (P910\_RS09730) **AGGAACAGCATGGAGATGTTTCAGAAA**  
 E Q M E M F R

Ann-1 (D934\_RS00755) **AGGAACAGCATGGAGATGTTTCAGAAA**  
 E Q V E M F R

EB92.1 (XFEB\_00416) **AGGAACAGCATGGAGATGTTTCAGAAA**  
 E Q V E M F R

GB514 (XFLM\_05125) **AGGAACAGCATGGAGATGTTTCAGAAA**  
 E L V E M F R

M23 (XfasM23\_1318) **AGGAACAGCATGGAGATGTTTCAGAAA**  
 E Q V E M F R

Temecula1 (PD1239) **AGGAACAGCATGGAGATGTTTCAGAAA**  
 E Q V E M F R

9a5c (XF2190-2191) **AGGAACAGCATGGAGATGTTTCAGAAA**  
 E Q V E M F R

CoDiRO (RA12\_11140) **AGGAACAGCATGGAGATGTTTCAGAAA**  
 E L V E M F R

CFBP 8072 (XYFPCFBP8072\_cc00010) **AGGAACAGCATGGAGATGTTTCAGAAA**  
 E Q V E M F R

CFBP 8073 (XYFPCFBP8073\_dx00010) **AGGAACAGCATGGAGATGTTTCAGAAA**  
 E Q V E M F R

6c (B375\_RS18005) **AGGAACAGCATGGAGATGTTTCAGAAA**  
 E Q V E M F R

32 (B398\_RS17775) **AGGAACAGCATGGAGATGTTTCAGAAA**  
 E Q V E M F R

## Von Willebrand factor type A

ATCC35871 (F820\_RS0101115) **CCGATCCTCACCAGCAGGATGCCATCCTGC**  
 P I L T D D A I L

Griffin-1 (M233\_11120) **CCGATCCTCACCAGCAGGATGCCATCCTGC**  
 P I L T D D A I L

M12 (XfasM12\_0914) **CCGATCCTCACCAGCAGGATGCCATCCTGC**  
 P I L T D D A I L

(XfasM12\_0653) **CCGATCCTCACCAGCAGGATGCCATCCTGC**  
 P I L T D D A I L

Mul0034 (P303\_03805) **CCGATCCTCACCAGCAGGATGCCATCCTGC**  
 P I L T D D A I L

(P303\_07930) **CCGATCCTCACCAGCAGGATGCCATCCTGC**  
 P I L T D D A I L

Mul-MD (P910\_002361) **CCGATCCTCACCAGCAGGATGCCATCCTGC**  
 P I L T D D A I L

Sy-VA (DF22\_RS10795) **CCGATCCTCACCAGCAGGATGCCATCCTGC**  
 P I L T D D A I L

Dixon (XFASADRAFT\_RS01420) **CCGATCCTCACCAGCAGGATGCCATCCTGC**  
 P I L T D D A I L

(XFASADRAFT\_RS02665) **CCGATCCTCACCAGCAGGATGCCATCCTGC**  
 P I L T D D A I L

(XFASADRAFT\_RS11395) **CCGATCCTCACCAGCAGGATGCCATCCTGC**  
 P I L T D D A I L

Ann-1 (D934\_RS07330) **CCGATCCTCACCAGCAGGATGCCATCCTGC**  
 P I L T D D A I L

(D934\_RS08480) **CCGATCCTCACCAGCAGGATGCCATCCTGC**  
 P I L T D D A I L

(D934\_RS09595) **CCGATCCTCACCAGCAGGATGCCATCCTGC**  
 P I L T D D A I L

EB92.1 (XFEB\_00076) **CCGATCCTCACCAGCAGGATGCCATCCTGC**  
 P I L T D D D I L

GB514 (XFLM\_09455) **CCGATCCTCACCAGCAGGATGCCATCCTGC**  
 P I L T D D D I L

M23 (XfasM23\_0811) **CCGATCCTCACCAGCAGGATGCCATCCTGC**  
 P I L T D D D I L

Temecula1 (PD0767) **CCGATCCTCACCAGCAGGATGCCATCCTGC**  
 P I L T D D D I L

9a5c (XF0526) **CCGATCCTCACCAGCAGGATGCCATCCTGC**  
 P I L T D D D A I L

(XF2115) **CCGATCCTCACCAGCAGGATGCCATCCTGC**  
 P I L T D D D A I L

CoDiRO (RA12\_09015) **CCGATCCTCACCAGCAGGATGCCATCCTGC**  
 P I L T D D A I L

CFBP 8072 (XYFPCFBP8072\_bs00010) **CCGATCCTCACCAGCAGGATGCCATCCTGC**  
 P I L T D D D I L

CFBP 8073 (XYFPCFBP8073\_fd00010) **CCGATCCTCACCAGCAGGATGCCATCCTGC**  
 P I L T D D D I L

6c (B375\_RS18275) **CCGATCCTCACCAGCAGGATGCCATCCTGC**  
 P I L T D D D I L

(B375\_RS15870) **CCGATCCTCACCAGCAGGATGCCATCCTGC**  
 P I L T D D D I L

32 (B398\_RS18210) **CCGATCCTCACCAGCAGGATGCCATCCTGC**  
 P I L T D D D I L

**Figure S7.** Candidate genes with k-mer fragments specific to four coffee-infecting strains of *X. fastidiosa*. For each candidate gene, the region containing the k-mer specific to coffee strains (*X. fastidiosa* subsp. *pauca* Strains 6c, 32 and CFBP 8072 and *X. fastidiosa* subsp. *fastidiosa/sandyi* Strain CFBP 8073) was aligned with corresponding regions in orthologs from other *X. fastidiosa* strains. The strain code is indicated for each strain followed by the locus tag of the candidate gene in that genome sequence.

## Cellobiosidase

|                                                     |                                                                |
|-----------------------------------------------------|----------------------------------------------------------------|
| ATCC35871 (F820_RS12200)                            | <b>TC CAG C C C C G C T T C T A G C T T C</b><br>S S S G S S   |
| Griffin-1 (M233_RS19950)                            | <b>TC CAG C C C C A C C C C C G C T T C</b><br>S S S S S S G   |
| M12 (Xfasm12_0598)                                  | <b>TC CAG C C C C A C C C C C G C T T C</b><br>S S S S S S G   |
| Mul0034 (P303_02185-P303_02190)                     | <b>TC CAG C C C C G C T T C T A C T T C</b><br>S S S G S T     |
| Mul-MD (P910_RS04945)                               | <b>TC CAG C C C C G C T T C T A C T T C</b><br>S S S G S T     |
| Sy-VA (DF22_RS00940)                                | <b>TC CAG C C C C A C C C C C G C T T C</b><br>S S S S S S G   |
| Dixon (XFASADRAFT_RS02915)                          | <b>TC CAG C C C C A C C C C C G C T T C</b><br>S S S S S S G   |
| Ann-1 (D934_RS03550)                                | <b>TC A A C C C C C G C T T C T A G C T T C</b><br>S S S G S S |
| EB92.1 (XFEB_01892)                                 | <b>TC T A G T T C T A C T T C T A G C T T C</b><br>S S S S S S |
| GB514 (XFLM_08105-XFLM_08110)                       | <b>TC T A G T T C T A C T T C T A G C T T C</b><br>S S S S S S |
| M23 (XfasM23_0553)                                  | <b>TC T A G T T C T A C T T C T A G C T T C</b><br>S S S S S S |
| Temecula1 (PD0529)                                  | <b>TC T A G T T C T A C T T C T A G C T T C</b><br>S S S S S S |
| 9a5c (XF1267)                                       | <b>TC CAG C C C C G C T T C T A G C T T C</b><br>S S S G S S   |
| CoDiRO (RA12_05855-RA12_05860)                      | <b>TC CAG C C C C G C C W A A A A A C C</b><br>S S S G * K     |
| CFBP 8072 (XYFPCFBP8072_p00410-XYFPCFBP8072_p00420) | <b>TC C G C C C C C G C T T C T A G C T T C</b><br>S G S G S S |
| CFBP 8073 (XYFPCFBP8073_cm00010)                    | <b>TC C G C C C C C G C T T C T A G C T T C</b><br>S G S G S S |
| 6c (B375_RS0113680)                                 | <b>TC C G C C C C C G C T T C T A G C T T C</b><br>S G S G S S |
| 32 (B398_RS0113725)                                 | <b>TC C G C C C C C G C T T C T A G C T T C</b><br>S G S G S S |

## Phage antirepressor

|                                                         |                                                                             |
|---------------------------------------------------------|-----------------------------------------------------------------------------|
| ATCC35871 (F820_RS0109215)                              | <b>G R R G T G R G G T A R C G T R G C C G G T A A</b><br>R C G T V A S     |
| (F820_RS0109470) (intergenic; 245bp-upstream)           | <b>G R R G T G R G G T A R C G T R G C C G G T A A</b>                      |
| Griffin-1 (M233_RS22595) (intergenic; 244bp-upstream)   | <b>A T G R R G T G R G G T A R C G T R G C C G G T A A</b>                  |
| M12 (Xfasm12_1162)                                      | <b>A T G R R G T G R G G T A R C G T R G C C G G T A A</b><br>R C G T V A S |
| Mul0034 (P303_02835)                                    | <b>A T G R R G T G R G G T A R C G T R G C C G G T A A</b><br>R C G T V A S |
| (P303_09510) (intergenic; 241bp-upstream)               | <b>A T G R R G T G R G G T A R C G T R G C C G G T A A</b>                  |
| Mul-MD (P910_RS10720) (intergenic; 246bp-upstream)      | <b>G R R G T G R G G T A R C G T R G C C T A G T A A</b>                    |
| (P910_RS10770)                                          | <b>G R R G T G R G G T A R C G T R G C C T A G T A A</b><br>R C G T V A S   |
| Sy-VA (DF22_RS10700)                                    | <b>G R R G T G R G G T A R C G T R G C C G G T A A</b><br>R C G T V A S     |
| Dixon (XFASADRAFT_RS05730) (intergenic; 241bp-upstream) | <b>A A R G R T G R G G T A R C G T R G C C G G T A A</b>                    |
| Ann-1 (D934_RS05835) (intergenic; 248bp-upstream)       | <b>G R R G T G R G G T A R C G T R G C C G G T A A</b>                      |
| (D934_RS06120) (intergenic; 244bp-upstream)             | <b>G R R G T G R G G T A R C G T R G C C G G T A A</b>                      |
| EB92.1 (XFEB_02046)                                     | <b>G R R G T G R G G T A R C G T R G C C T A G T A A</b><br>R C G T V A S   |
| (XFEB_02052)                                            | <b>G R R G T G R G G T A R C G T R G C C T A G T A A</b><br>R C G T V A S   |
| GB514 (XFLM_11365) (intergenic; 244bp-upstream)         | <b>G R R G T G R G G T A R C G T R G C C T A G T A A</b>                    |
| M23 (XfasM23_1182)                                      | <b>G R R G T G R G G T A R C G T R G C C T A G T A A</b><br>R C G T V A S   |
| (XfasM23_1184)                                          | <b>G R R G T G R G G T A R C G T R G C C T A G T A A</b><br>R C G T V A S   |
| Temecula1 (PD1117)                                      | <b>G R R G T G R G G T A R C G T R G C C T A G T A A</b><br>R C G T V A S   |
| (PD1119)                                                | <b>G R R G T G R G G T A R C G T R G C C T A G T A A</b><br>R C G T V A S   |
| 9a5c (XF2507) (intergenic; 145bp-upstream)              | <b>A R R G R T G R G G T A R C G T R G C C T G G T A A</b>                  |
| CoDiRO (RA12_07555) (intergenic; 37bp-downstream)       | <b>G R R G T G R G G T A R C G T R G C C G G T A A</b>                      |
| CFBP 8072 (XYFPCFBP8072_ap00120)                        | <b>A R R G R T G R G G T A R C G T R G C C G G T A A</b><br>R C G T V A S   |
| CFBP 8073 (XYFPCFBP8073_aq00060)                        | <b>A R R G R T G R G G T A R C G T R G C C G G T A A</b><br>R C G T V A S   |
| 6c (B375_RS20650) (intergenic; 243bp-upstream)          | <b>A R R G R T G R G G T A R C G T R G C C G G T A A</b>                    |
| 32 (B398_RS0114070) (intergenic; 244bp-upstream)        | <b>A R R G R T G R G G T A R C G T R G C C G G T A A</b>                    |

Figure S7 (continued)



**Table S1.** *P* values determined using the Shimodaira-Hasegawa test of tree topologies run on each of the maximum likelihood trees based on the 7 loci and the data set of concatenated sequences.

|             | <i>cysG</i> | <i>glfT</i> | <i>holC</i> | <i>leuA</i> | <i>malF</i> | <i>nuoL</i> | <i>petC</i> | Conc <sup>1</sup> |
|-------------|-------------|-------------|-------------|-------------|-------------|-------------|-------------|-------------------|
| <i>cysG</i> | -           | 0.005       | 0.000       | 0.000       | 0.000       | 0.018       | 0.027       | 0.000             |
| <i>glfT</i> | 0.000       | -           | 0.000       | 0.000       | 0.000       | 0.000       | 0.000       | 0.000             |
| <i>holC</i> | 0.000       | 0.000       | -           | 0.000       | 0.000       | 0.000       | 0.000       | 0.000             |
| <i>leuA</i> | 0.000       | 0.000       | 0.000       | -           | 0.008       | 0.000       | 0.007       | 0.000             |
| <i>malF</i> | 0.000       | 0.000       | 0.000       | 0.066       | -           | 0.000       | 0.005       | 0.000             |
| <i>nuoL</i> | 0.000       | 0.000       | 0.000       | 0.007       | 0.000       | -           | 0.000       | 0.000             |
| <i>petC</i> | 0.000       | 0.000       | 0.000       | 0.000       | 0.000       | 0.000       | -           | 0.000             |
| Conc        | 0.415       | 0.019       | 0.100       | 0.215       | 0.624       | 0.077       | 0.105       | -                 |

<sup>1</sup>Concatenated data set

**Table S2.** Sequence variation at the seven loci among the 44 *X. fastidiosa* strains used in the MLSA.

| Locus                | GC<br>% | Sites <sup>a</sup> | S <sup>b</sup> | Hap <sup>c</sup> | Hd <sup>d</sup> | $\theta_{\pi}$ <sup>e</sup> | $\theta_w$ <sup>f</sup> | Tajima's<br>D <sup>g</sup> | Fu & Li's<br>D <sup>g</sup> | Fu 's F <sup>g</sup> |
|----------------------|---------|--------------------|----------------|------------------|-----------------|-----------------------------|-------------------------|----------------------------|-----------------------------|----------------------|
| <i>cysG</i>          | 61.8    | 600                | 54             | 18               | 0.915           | 0.01825                     | 0.20690                 | -0.52740                   | 0.17484                     | 0.290                |
| <i>gltT</i>          | 53.3    | 654                | 25             | 12               | 0.800           | 0.01212                     | 0.00880                 | 0.92589                    | 0.37741                     | 2.359                |
| <i>holC</i>          | 61.6    | 379                | 37             | 17               | 0.906           | 0.02466                     | 0.02250                 | 0.13773                    | 0.44541                     | 0.074                |
| <i>leuA</i>          | 52.9    | 708                | 30             | 12               | 0.833           | 0.00953                     | 0.00974                 | -0.18139                   | -0.42531                    | 1.527                |
| <i>malF</i>          | 50.6    | 730                | 46             | 12               | 0.905           | 0.01441                     | 0.01463                 | -0.19598                   | 0.39165                     | 4.108                |
| <i>nuoL</i>          | 51.0    | 557                | 42             | 13               | 0.876           | 0.01932                     | 0.01836                 | -0.06145                   | 1.19143                     | 3.076                |
| <i>petC</i>          | 51.5    | 533                | 24             | 9                | 0.735           | 0.01095                     | 0.01035                 | 0.19324                    | -0.41645                    | 3.094                |
| Concat. <sup>h</sup> | 54.2    | 4161               | 259            | 32               | 0.970           | 0.01493                     | 0.01441                 | -0.03785                   | 0.36260                     | 1.172                |

<sup>a</sup>number of analyzed sites

<sup>b</sup>number of polymorphic sites

<sup>c</sup>number of haplotypes

<sup>d</sup>haplotype diversity (**Nei M.** 1987. Molecular evolutionary genetics. Columbia Univ. Press, New York.)

<sup>e</sup>nucleotide diversity (**Nei M.** 1987. Molecular evolutionary genetics. Columbia Univ. Press, New York.)

<sup>f</sup>nucleotide diversity from S (**Watterson GA.** 1975. On the number of segregating sites in genetical models without recombination. Theoret. Pop. Biol. 7:256-276.)

<sup>g</sup>neutrality tests of Tajima (**Tajima F.** 1989. Statistical method for testing the neutral mutation hypothesis by DNA polymorphism. Genetics 123:585–595. ) and Fu & Li (**Fu YX, Li WH.** 1993. Statistical tests of neutrality of mutations. Genetics 133:693–709.) and associated P-value: (\*  $p < 0.05$ )

<sup>h</sup>data set of concatenated sequences

**Table S3.** Average nucleic identity (ANIb) values derived from 19 *X. fastidiosa* genome sequence pairwise comparisons.

| Strain code   | PLS<br>229 | ATCC<br>35871 | Sy-<br>VA | M12   | Griffin | Dixon | Mul-<br>MD | Mul<br>0034 | Ann-1 | CFBP<br>8073 | Temecula1 | M23   | GB<br>514 | EB<br>92.1 | 9a5c  | 6c    | 32    | CoDi-<br>RO | CFBP<br>8072 |
|---------------|------------|---------------|-----------|-------|---------|-------|------------|-------------|-------|--------------|-----------|-------|-----------|------------|-------|-------|-------|-------------|--------------|
| PLS229        | ---        | 83.64         | 83.56     | 83.64 | 83.65   | 83.59 | 83.47      | 83.41       | 83.44 | 83.49        | 83.41     | 83.40 | 83.46     | 83.51      | 83.77 | 83.77 | 83.80 | 83.77       | 83.77        |
| ATCC<br>35871 | 83.89      | ---           | 99.45     | 99.39 | 99.40   | 99.43 | 98.26      | 98.25       | 97.60 | 97.72        | 97.74     | 97.73 | 97.76     | 97.72      | 96.30 | 96.23 | 96.31 | 96.30       | 96.55        |
| Sy-VA         | 83.70      | 99.38         | ---       | 99.31 | 99.31   | 99.36 | 98.17      | 98.17       | 97.50 | 97.57        | 97.70     | 97.69 | 97.72     | 97.65      | 96.18 | 96.17 | 96.23 | 96.15       | 96.45        |
| M12           | 83.74      | 99.31         | 99.35     | ---   | 99.95   | 99.68 | 97.85      | 97.79       | 97.51 | 97.47        | 97.55     | 97.53 | 97.52     | 97.50      | 96.15 | 96.22 | 96.23 | 96.21       | 96.48        |
| Griffin       | 83.77      | 99.39         | 99.37     | 99.98 | ---     | 99.69 | 97.92      | 97.90       | 97.49 | 97.51        | 97.56     | 97.56 | 97.54     | 97.52      | 96.21 | 96.22 | 96.21 | 96.26       | 96.56        |
| Dixon         | 83.59      | 99.33         | 99.27     | 99.58 | 99.57   | ---   | 97.86      | 97.82       | 97.44 | 97.40        | 97.46     | 97.55 | 97.44     | 97.40      | 96.03 | 96.05 | 96.10 | 96.13       | 96.39        |
| Mul-MD        | 83.51      | 98.19         | 98.10     | 97.73 | 97.78   | 97.76 | ---        | 99.77       | 97.99 | 98.29        | 98.40     | 98.37 | 98.40     | 98.49      | 95.81 | 95.78 | 95.83 | 95.97       | 96.20        |
| Mul0034       | 83.30      | 98.06         | 97.95     | 97.61 | 97.65   | 97.64 | 99.79      | ---         | 97.89 | 98.22        | 98.33     | 98.29 | 98.39     | 98.42      | 95.67 | 95.65 | 95.74 | 95.80       | 96.08        |
| Ann-1         | 83.38      | 97.41         | 97.31     | 97.12 | 97.16   | 97.16 | 97.89      | 97.82       | ---   | 98.12        | 97.97     | 97.97 | 97.99     | 98.02      | 95.65 | 95.77 | 95.74 | 95.93       | 96.16        |
| CFBP 8073     | 83.47      | 97.39         | 97.32     | 97.13 | 97.17   | 97.16 | 98.11      | 98.01       | 97.97 | ---          | 98.75     | 98.72 | 98.74     | 98.84      | 95.65 | 95.76 | 95.77 | 95.84       | 96.14        |
| Temecula1     | 83.40      | 97.68         | 97.58     | 97.35 | 97.4    | 97.36 | 98.41      | 98.39       | 98.04 | 98.89        | ---       | 99.90 | 99.91     | 99.71      | 95.82 | 95.80 | 95.90 | 95.92       | 96.23        |
| M23           | 83.33      | 97.69         | 97.56     | 97.35 | 97.36   | 97.42 | 98.32      | 98.30       | 98.00 | 98.83        | 99.87     | ---   | 99.83     | 99.64      | 95.79 | 95.78 | 95.87 | 95.93       | 96.19        |
| GB514         | 83.44      | 97.65         | 97.58     | 97.40 | 97.43   | 97.42 | 98.43      | 98.39       | 98.09 | 98.82        | 99.93     | 99.89 | ---       | 99.72      | 95.83 | 95.83 | 95.90 | 95.91       | 96.25        |
| EB92.1        | 83.48      | 97.63         | 97.59     | 97.33 | 97.33   | 97.26 | 98.45      | 98.44       | 98.09 | 98.78        | 99.64     | 99.62 | 99.67     | ---        | 95.74 | 95.73 | 95.78 | 95.97       | 96.15        |
| 9a5c          | 83.73      | 96.17         | 96.12     | 96.07 | 96.13   | 96.04 | 95.85      | 95.76       | 95.83 | 95.95        | 95.84     | 95.86 | 95.84     | 95.85      | ---   | 98.85 | 99.16 | 98.10       | 97.96        |
| 6c            | 83.91      | 96.24         | 96.16     | 96.17 | 96.18   | 96.13 | 95.83      | 95.82       | 95.90 | 95.95        | 95.85     | 95.82 | 95.84     | 95.86      | 98.86 | ---   | 98.88 | 98.19       | 97.96        |
| 32            | 83.92      | 96.09         | 96.00     | 95.89 | 95.93   | 95.89 | 95.68      | 95.64       | 95.68 | 95.82        | 95.8      | 95.77 | 95.75     | 95.80      | 99.06 | 98.77 | ---   | 97.98       | 97.86        |
| CoDiRO        | 83.92      | 96.27         | 96.21     | 96.16 | 96.18   | 96.16 | 96.07      | 96.01       | 96.06 | 96.19        | 96.08     | 96.06 | 96.05     | 96.11      | 98.21 | 98.25 | 98.28 | ---         | 98.66        |
| CFBP 8072     | 83.72      | 96.19         | 96.06     | 96.09 | 96.08   | 96.06 | 95.96      | 95.92       | 96.01 | 96.02        | 96.02     | 95.99 | 96.09     | 96.07      | 97.74 | 97.67 | 97.86 | 98.29       | ---          |
